# Supplementary material
Source: PubMed Central journal article supplement (PMC2723019)
Supplement: blood-2009-03-209981_1.pdf [file blood-2009-03-209981_1.pdf]

| <b>Full Name and Clone</b>                                | <b>Concentration</b> | <b>Manufacturer</b>            |
|-----------------------------------------------------------|----------------------|--------------------------------|
| <b><i>Primary Antibodies</i></b>                          |                      |                                |
| Goat anti Human EPCR, Polyclonal                          | 5<br>µg/ml           | R & D Systems, Minneapolis, MN |
| Mouse anti Human Thrombomodulin, clone 141C01             | 2.6                  | Lab Vision Corp, Fremont, CA   |
| Rabbit anti Human von Willebrand Factor, Polyclonal       | 3                    | DAKO, Carpinteria, CA          |
| <b><i>Secondary Antibodies</i></b>                        |                      |                                |
| Alexa Fluor <sup>®</sup> 555 donkey anti-goat IgG (H+L)   | 4                    | Invitrogen, Carlsbad, CA       |
| Alexa Fluor <sup>®</sup> 647 donkey anti-mouse IgG (H+L)  | 4                    | Invitrogen, Carlsbad, CA       |
| Alexa Fluor <sup>®</sup> 488 donkey anti-rabbit IgG (H+L) | 4                    | Invitrogen, Carlsbad, CA       |
