# Supplementary material
Source: PubMed Central journal article supplement (PMC2723019)
Supplement: blood-2009-03-209981_2.pdf [file blood-2009-03-209981_2.pdf]

Comparison of Lumen vs. Sinus

| Vein                  | VWF       |           |            | EPCR      |           |            | TM        |           |            |
|-----------------------|-----------|-----------|------------|-----------|-----------|------------|-----------|-----------|------------|
|                       | Lumen     | Sinus     | Difference | Lumen     | Sinus     | Difference | Lumen     | Sinus     | Difference |
| 1                     | 3,436,023 | 3,597,320 | -161,298   | 2,048,297 | 7,220,616 | -5,172,319 | 1,051,538 | 1,352,884 | -301,346   |
| 2                     | 606,896   | 70,446    | 536,450    | 1,003,169 | 2,744,583 | -1,741,414 | 22,919    | 1,508,141 | -1,485,222 |
| 3                     | 3,495,189 | 302,656   | 3,192,533  | 1,352,746 | 2,817,646 | -1,464,901 | 807,512   | 2,825,592 | -2,018,080 |
| 4                     | 3,155,665 | 54,556    | 3,101,110  | 2,489,943 | 4,454,583 | -1,964,640 | 2,609,437 | 3,247,441 | -638,004   |
| 5                     | 2,513,550 | 48,331    | 2,465,219  | 1,364,797 | 3,027,357 | -1,662,560 | 520,135   | 723,115   | -202,980   |
| 6                     | 4,034,410 | 173,815   | 3,860,595  | 1,509,630 | 2,526,787 | -1,017,157 | 497,875   | 1,498,210 | -1,000,336 |
| 7                     | 7,808,633 | 1,833,616 | 5,975,017  | 3,728,856 | 4,172,995 | -444,139   | 885,543   | 4,016,273 | -3,130,730 |
| 8                     | 2,492,265 | 1,128,727 | 1,363,538  | 43,080    | 2,390,000 | -2,346,919 | 522,796   | 1,266,799 | -744,003   |
| 9                     | 765,004   | 1,417,550 | -652,546   | 31,534    | 3,367,644 | -3,336,110 | 79,233    | 844,900   | -765,667   |
| 10                    | 2,913,875 | 738,397   | 2,175,478  | 18,910    | 3,051,721 | -3,032,811 | 292,957   | 1,739,914 | -1,446,957 |
| 11                    | 661,412   | 1,399,086 | -737,675   | 1,797,776 | 6,169,300 | -4,371,524 | 0         | 1,243,851 | -1,243,851 |
| Mean                  |           |           | 1,919,856  |           |           | -2,414,045 |           |           | -1,179,743 |
| SEM                   |           |           | 631,181    |           |           | 433,057    |           |           | 253,890    |
| Paired t test p value |           |           | 0.01       |           |           | <0.001     |           |           | <0.001     |
